# Supplementary material for: Tuning collagen and collagen-alginate mechanics through extrusion bioprinting process parameters
Source: Royal Society of Chemistry journal article supplement (doi:10.1039/d5ra03922c), 2025-01-01
Supplement: d5ra03922c1.pdf [file d5ra03922c1.pdf]

## **Tuning collagen and collagen-alginate mechanics through extrusion bioprinting process parameters**

Grace Hu<sup>1</sup>, Karla Gutierrez Cebrero<sup>2,‡</sup>, Nandita Venkataraman<sup>3,‡</sup>, Dharneedar Ravichandran<sup>3</sup>, Yunzhi Lin<sup>2</sup>, Zeqing Jin<sup>3</sup>, Zev J. Gartner<sup>1,4,5</sup>, and Grace X. Gu<sup>1,3,\*</sup>

<sup>1</sup>UC Berkeley-UC San Francisco Graduate Program in Bioengineering, Berkeley, CA 94720, USA

<sup>2</sup>Department of Bioengineering, University of California, Berkeley, CA 94720, USA

<sup>3</sup>Department of Mechanical Engineering, University of California, Berkeley, CA, 94720, USA

<sup>4</sup>Department of Pharmaceutical Chemistry, University of California, San Francisco, San Francisco, CA 94158, USA

<sup>5</sup>Chan Zuckerberg Biohub, San Francisco, CA 94158, USA

<sup>‡</sup>*These authors contributed equally*

\*Corresponding author: [ggu@berkeley.edu](mailto:ggu@berkeley.edu)

### **Supplementary Information**

Figure S1. Bioprinting and Mechanical Setup

Figure S2. Printability Evaluation Example for More Transparent Composite Blend

Figure S3. Compression Properties Measured for Pure Collagen Samples

Table S1. Summary of ANOVA Results

Table S2. Summary of ANOVA Results for Pure Collagen Compression Samples

Figure S4. SEM Surface Morphology

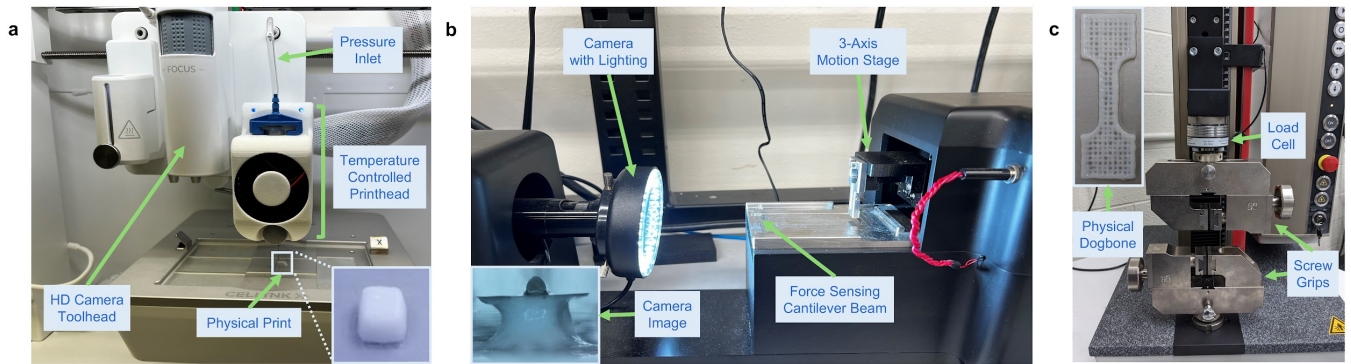

**Figure S1. Bioprinting and Mechanical Setup.** (a) CELLINK BioX 3D-printer with a temperature-controlled pneumatic printhead. The inset shows an example of a final pure collagen print. (b) CellScale MicroTester LT compression device with a 3-axis motion stage and force sensing cantilever beam. Inset displays camera view of collagen sample under the compression plate. (c) zwickiLine tensile testing machine using screw grips with inset showing a sample collagen dogbone.

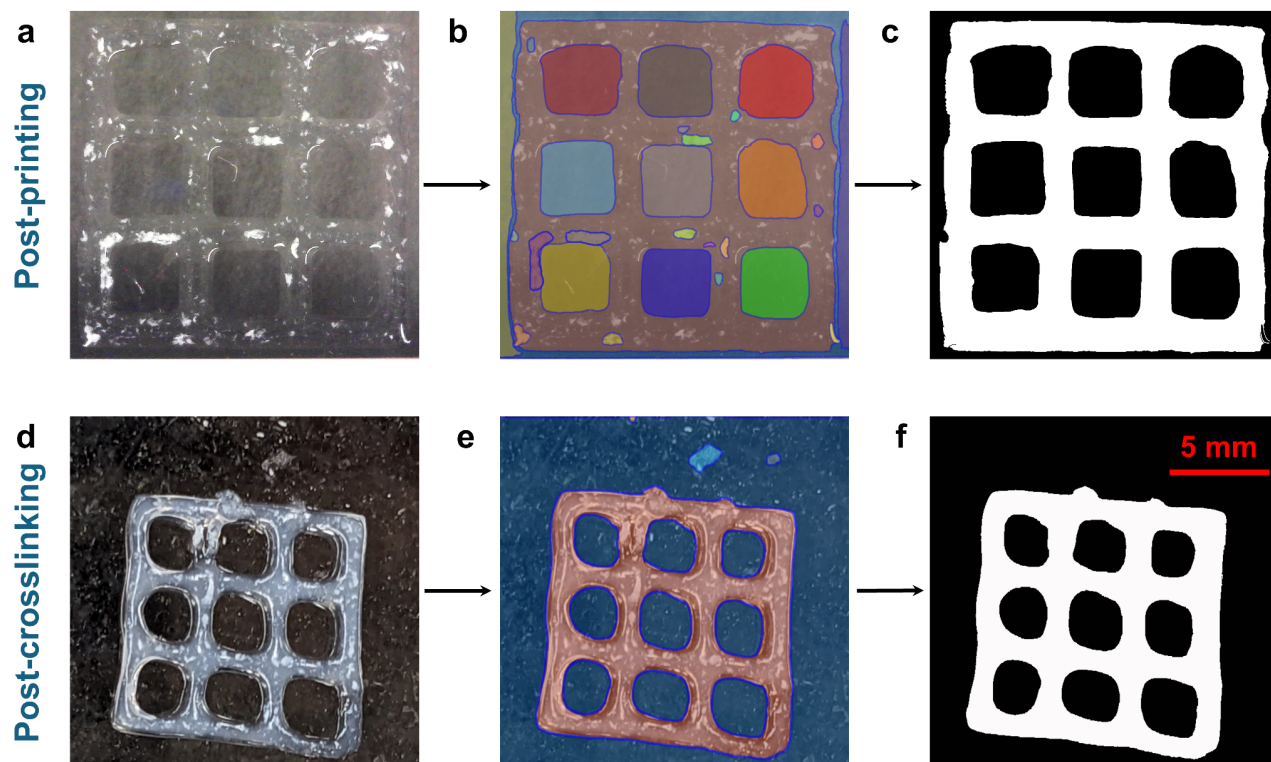

**Figure S2. Printability Evaluation Example for More Transparent Composite Blend.** (a) Representative  $C_{1A_{10}}$  printed sample before crosslinking is quite transparent, causing the SAM model to create (b) a labeled object with edges poorly detected due to optical effects. (c) Binary hydrogel lattice has rougher edges due to small boundary regions improperly excluded but aggregates the main region decently well. (d) The same  $C_{1A_{10}}$  sample after 24 h crosslinking, which has become more opaque and the grid region better labeled in (e) as a single unit. (f) Extracted lattice with binary mask demonstrates significant sample shrinkage after long crosslinking periods. Scale bar = 5 mm.

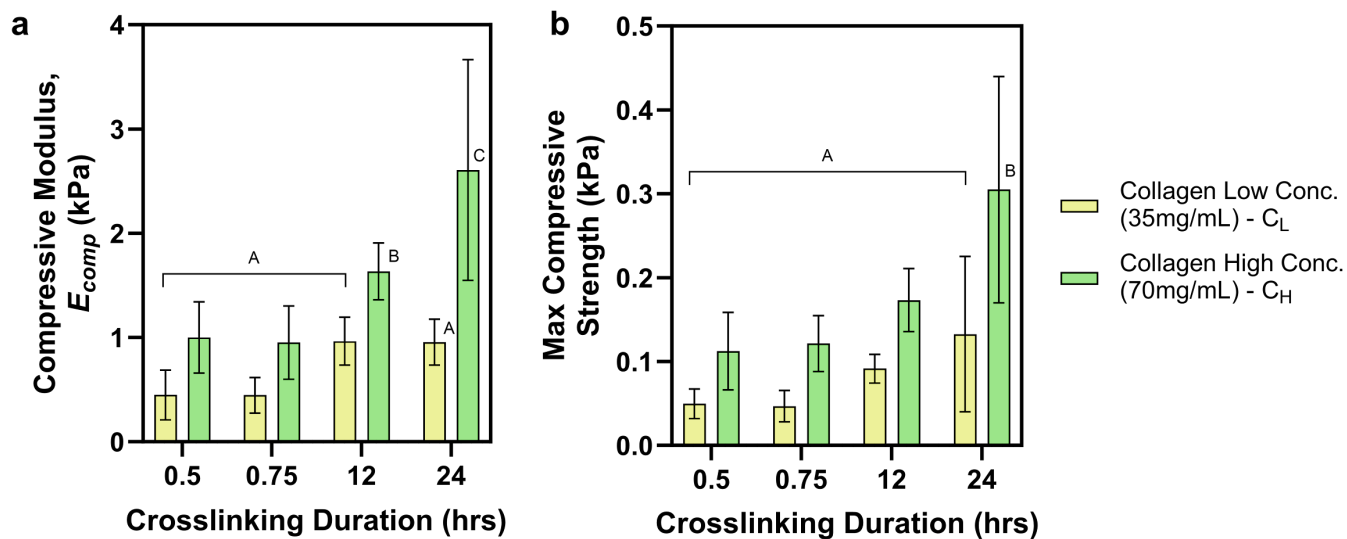

**Figure S3. Compression Properties Measured for Pure Collagen.** (a) Compressive modulus and (b) max compressive strength evaluated across for pure collagen at 35 mg/mL and 70 mg/mL. Stronger mechanical behaviors are seen with higher concentration and longer crosslinking durations, suggesting that total time of crosslinking may need to be more than manufacturer's recommended minimum time of 30 min. Different letters (A or B) by the top of each bar indicate pairwise differences, where there are significant differences between any two conditions receiving different letters ( $p < 0.05$ ).



**Table S1. Summary of ANOVA Results.** Two-way ANOVA and three-way ANOVA were performed for compression and tension data shown in the main manuscript, respectively, due to the number of independent variables for comparison.

|                    | Source                                               | SS      | df | F      | p           |
|--------------------|------------------------------------------------------|---------|----|--------|-------------|
| <b>Compression</b> | Between                                              |         |    |        |             |
|                    | Composition                                          | 950.292 | 4  | 19.129 | 7.31E-09 ** |
|                    | Crosslinking Duration                                | 15.703  | 1  | 1.264  | 0.268       |
|                    | Composition × Crosslinking Duration                  | 392.737 | 4  | 7.905  | 8.57E-05 ** |
|                    | Error                                                | 496.791 | 40 |        |             |
|                    | Between                                              |         |    |        |             |
|                    | Composition                                          | 5.427   | 4  | 15.196 | 1.23E-07 ** |
|                    | Crosslinking Duration                                | 0.296   | 1  | 3.315  | 0.076       |
|                    | Composition × Crosslinking Duration                  | 2.794   | 4  | 7.822  | 9.35E-05 ** |
|                    | Error                                                | 3.571   | 40 |        |             |
| <b>Tension</b>     | Between                                              |         |    |        |             |
|                    | Composition                                          | 2.070   | 2  | 36.125 | 2.68E-10 ** |
|                    | Crosslinking Duration                                | 0.117   | 1  | 4.089  | 0.049 *     |
|                    | Infill Density                                       | 0.000   | 1  | 0.003  | 0.953       |
|                    | Composition × Crosslinking Duration                  | 0.256   | 2  | 4.475  | 0.017 *     |
|                    | Composition × Infill Density                         | 0.121   | 2  | 2.117  | 0.131       |
|                    | Crosslinking Duration × Infill Density               | 0.480   | 1  | 16.771 | 1.61E-04 ** |
|                    | Composition × Crosslinking Duration × Infill Density | 0.445   | 2  | 7.775  | 1.19E-03 *  |
|                    | Error                                                | 1.375   | 48 |        |             |
|                    | Between                                              |         |    |        |             |
|                    | Composition                                          | 1.619   | 2  | 19.889 | 5.11E-07 ** |
|                    | Crosslinking Duration                                | 0.009   | 1  | 0.232  | 0.633       |
|                    | Infill Density                                       | 0.076   | 1  | 1.876  | 0.177       |
|                    | Composition × Crosslinking Duration                  | 0.146   | 2  | 1.789  | 0.178       |
|                    | Composition × Infill Density                         | 0.204   | 2  | 2.510  | 0.092       |
|                    | Crosslinking Duration × Infill Density               | 0.924   | 1  | 22.709 | 1.78E-05 ** |
|                    | Composition × Crosslinking Duration × Infill Density | 0.330   | 2  | 4.060  | 0.023 *     |
|                    | Error                                                | 1.953   | 48 |        |             |

Note: \*  $p < 0.05$ ; \*\*  $p < 0.001$ .

**Table S2. Summary of ANOVA Results for Pure Collagen Samples.** Two-way ANOVA was performed for collagen-only samples shown in supplementary compression data to identify the effects of variables (composition and crosslinking duration) and for their interaction effects for two data sets (compressive modulus and max compressive strength).

|                                        | Source                              | <i>SS</i> | <i>df</i> | <i>F</i> | <i>p</i>    |
|----------------------------------------|-------------------------------------|-----------|-----------|----------|-------------|
| <b>Compression<br/>(Pure Collagen)</b> | Between                             |           |           |          |             |
|                                        | Compressive Modulus                 |           |           |          |             |
|                                        | Composition                         | 7.122     | 1         | 35.168   | 1.00E-06 ** |
|                                        | Crosslinking Duration               | 8.025     | 3         | 13.210   | 9.00E-06 ** |
|                                        | Composition × Crosslinking Duration | 2.212     | 3         | 3.642    | 0.023 *     |
|                                        | Error                               | 6.480     | 32        |          |             |
|                                        | Between                             |           |           |          |             |
|                                        | Max Compressive Strength            |           |           |          |             |
|                                        | Composition                         | 0.096     | 1         | 23.678   | 2.90E-05 ** |
|                                        | Crosslinking Duration               | 0.124     | 3         | 10.207   | 7.20E-05 ** |
|                                        | Composition × Crosslinking Duration | 0.019     | 3         | 1.561    | 0.218       |
|                                        | Error                               | 0.130     | 32        |          |             |

Note: \*  $p < 0.05$ ; \*\*  $p < 0.001$ .

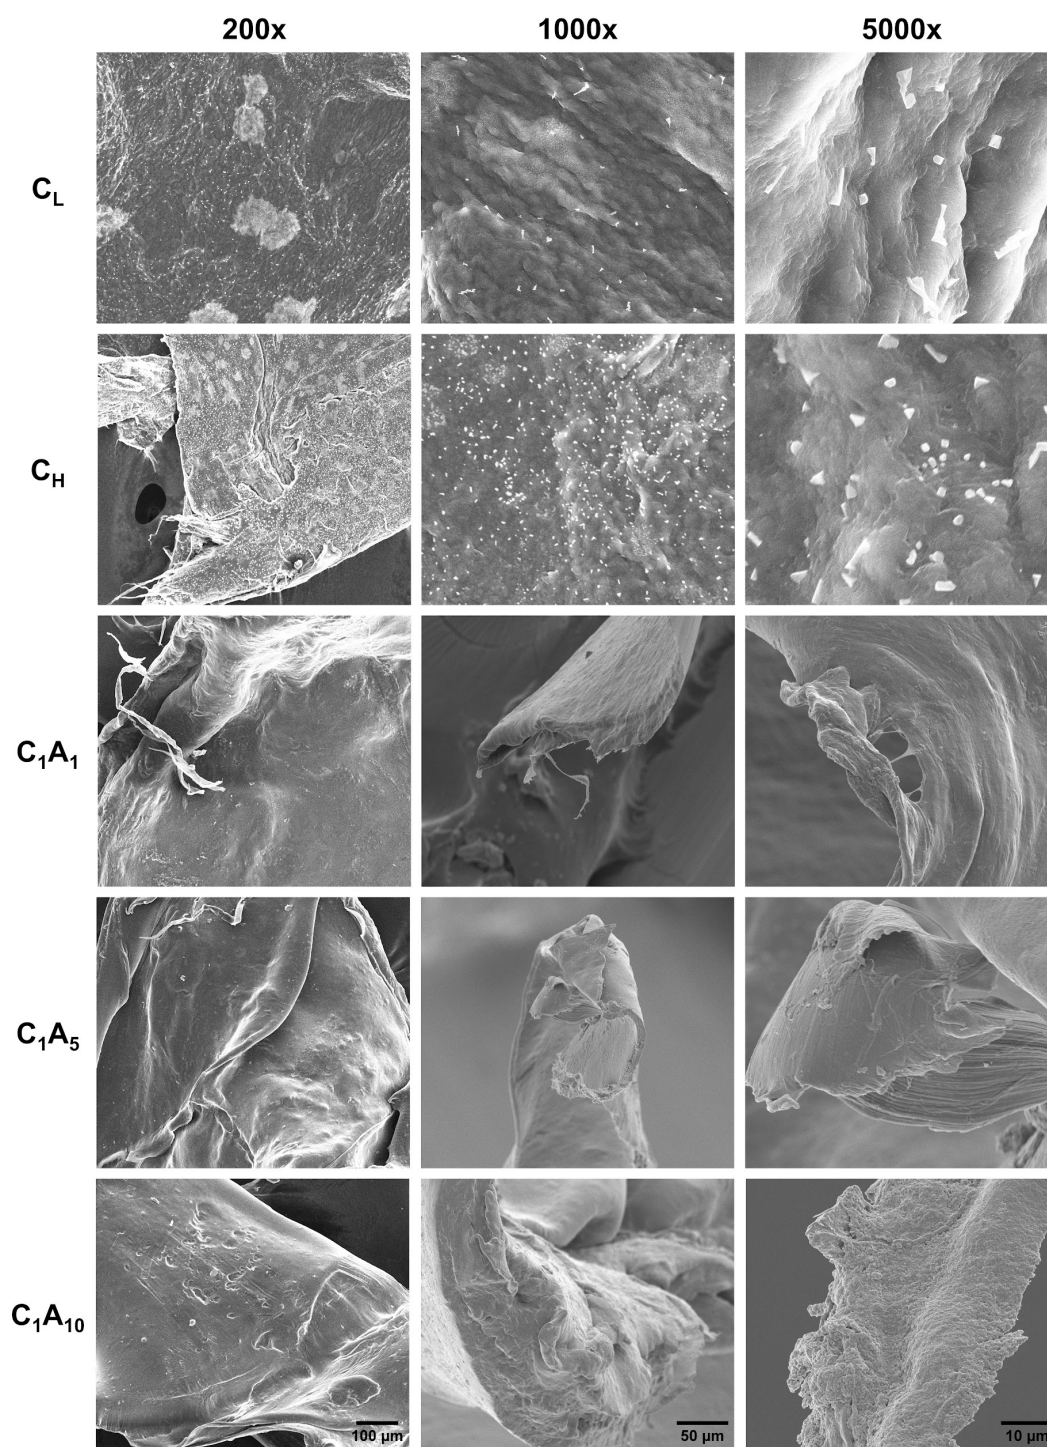

**Figure S4. SEM Surface Morphology.** Comparison of microstructures for collagen and collagen-alginate printability grids captured at different magnifications. Scale bars are the same for each image in the respective magnification column.
